*Hnf1b*-CreER, a model used for fate mapping pancreatic lineages, achieves efficient Cre-mediated recombination in duct and islet  $\delta$  cells

Meritxell Rovira<sup>1,2,3,4\*</sup>#, Miguel Angel Maestro<sup>5,6</sup>#, Vanessa Grau<sup>5,6</sup>, Jorge Ferrer<sup>5,6,7\*</sup>

1. Department of Physiological Science, School of Medicine, Universitat de Barcelona (UB), L'Hospitalet de Llobregat, Spain.

2. Pancreas Regeneration: Pancreatic Progenitors and Their Niche Group, Regenerative Medicine Program, Institut d'Investigació Biomèdica de Bellvitge - IDIBELL, L'Hospitalet de Llobregat, Spain.

3. Program for advancing the Clinical Translation of Regenerative Medicine of Catalonia, P-CMR[C], L'Hospitalet de Llobregat, Spain.

4. Center for Networked Biomedical Research on Bioengineering, Biomaterials and Nanomedicine (CIBER-BBN), Madrid, Spain.

5. Regulatory Genomics and Diabetes, Centre for Genomic Regulation, the Barcelona Institute of Science and Technology, Barcelona, Spain.

6. Centro de Investigación Biomédica en red Diabetes y enfermedades metabólicas asociadas (CIBERDEM).

7. Section of Genetics and Genomics, Department of Metabolism, Digestion and Reproduction, Imperial College London, London, UK.

(\* ) Corresponding authors

Meritxell Rovira ([mrovira@idibell.cat](mailto:mrovira@idibell.cat)) , Jorge Ferrer ([jorge.ferrer@crg.eu](mailto:jorge.ferrer@crg.eu))

(#) Equal contribution

## Abstract

The *Hnf1b*-CreER<sup>T2</sup> BAC transgenic (Tg(*Hnf1b*-cre/ERT2)1Jfer) has been used extensively to trace the progeny of pancreatic ducts in development, regeneration, or cancer. This model originally showed that duct-like plexus cells of the embryonic pancreas are bipotent duct-endocrine progenitors, whereas adult mouse duct cells are not a common source of  $\beta$  cells in various regenerative settings. We have now examined *Hnf1b*-CreER<sup>T2</sup> mice with a Rosa26-RFP reporter transgene. This showed inducible recombination of up to 96% adult duct cells, a much higher efficiency than the previously used  $\beta$ -galactosidase reporter. Despite this high duct-cell excision, recombination in  $\alpha$  and  $\beta$  cells remained very low, similar to the previously used reporter transgene (Rosa26- $\beta$ galactosidase). However, nearly half of somatostatin-expressing  $\delta$  cells showed reporter activation, which was due to Cre expression in  $\delta$  cells rather than an indication of duct to  $\delta$  cell conversions. The high recombination efficiency in duct cells indicates that the *Hnf1b*-CreER<sup>T2</sup> model can be useful for both ductal fate mapping and genetic inactivation studies. The recombination in  $\delta$  cells does not modify the interpretation of studies that failed to show duct conversions to other cell types, but needs to be considered in studies that use this model to modify the plasticity of pancreatic duct cells.

## Main text

Genetic lineage tracing can provide unequivocal evidence for lineage relationships. This is typically carried out with a mouse allele that achieves specific expression of a Cre recombinase in a candidate progenitor cell type (Cre driver), combined with a second allele that undergoes Cre-based excision of a STOP cassette flanked by LoxP sites. Cre-mediated activation of the reporter (Cre responder) in the putative progenitor allows tracing all of its cellular progeny.

In several instances, genetic lineage tracing has challenged pre-existing conceptions that are rooted on the assumption that whenever a cell co-expresses markers from two different lineages it must be transitioning between both lineages, or represent some form of progenitor that can differentiate to different lineages. For example, the co-expression of insulin and glucagon in embryonic pancreatic cells was initially thought to indicate that  $\beta$  cells originate from common bi-hormonal cells, but lineage tracing studies later disproved this notion, showing that insulin and glucagon-expressing cells arise as separate lineages (Herrera 2000).. Likewise, insulin-expressing cells that reside in the adult pancreatic duct epithelium and co-express cytokeratin have often been referred to as duct-derived neogenic  $\beta$  cells. Such a putative postnatal source of adult  $\beta$  cells aligns well with the fact that duct-like cells from

the embryonic plexus are bipotent progenitors of endocrine and duct cells (Zhou, Law et al. 2007, Solar, Cardalda et al. 2009, Kopp, Dubois et al. 2011). This hypothesis was tested using a BAC transgenic that contains ~190 Kb of the *Hnf1b* locus and drives an inducible Cre recombinase in pancreatic duct cells (*Hnf1b*-CreER<sup>T2</sup>, or Tg(Hnf1b-cre/ERT2)1Jfer) (Solar, Cardalda et al. 2009). These experiments, which used a Rosa26- $\beta$  galactosidase ( $\beta$ gal) reporter, concluded that –contrary to earlier beliefs– mouse adult pancreatic duct cells do not give rise to  $\beta$  cells during the normal lifespan of mice, or under several regenerative settings that have been proposed to result in duct to endocrine transdifferentiation (Solar, Cardalda et al. 2009). Similar results were obtained with other duct Cre lines– including *Hes1* (Kopinke, Brailsford et al. 2011), *Sox9* (Kopp, Dubois et al. 2011) and *Mucin1* (Kopinke and Murtaugh 2010), and are compatible with  $\beta$  cell or dual  $\beta$  cell/non  $\beta$  cell lineage tracing in regeneration models (Nir, Melton et al. 2007, Zhao, Huang et al. 2021). Thus, with the exception of studies using the CAII promoter (Inada, Nienaber et al. 2008), genetic lineage studies have suggested that duct-like cells give rise to endocrine cells throughout development but are not a common source in the adult pancreas. It is nevertheless possible that pancreatic duct cells can be manipulated to transdifferentiate into  $\beta$  cells as a replacement therapy for diabetes.

Genetic lineage tracing is critically dependent on careful design and precise knowledge of which cell types are labeled at the outset of the labeling experiment. Failure to define this parameter can lead to erroneous conclusions concerning the cellular origins of cells being examined. The *Hnf1b*-CreER<sup>T2</sup> BAC transgenic line has been used by numerous publications to study the progeny of HNF1B-expressing cells in a wide range of experimental models, including cancer, dynamics of cellular differentiation, or regeneration (Jörs, Jeliaskova et al. 2015, Kim, Larsen et al. 2015, Vieira, Vergoni et al. 2018, Seymour, Collin et al. 2020). This underscores a need to more fully define its performance.

In the current study we have extended the characterization of *Hnf1b*-CreER<sup>T2</sup> BAC transgenic model using Rosa26-RFP instead of two previously employed reporter lines, Rosa26YFP and Rosa26- $\beta$ gal. With the Rosa26-RFP reporter, Cre-based excision of a stop cassette leads to expression of a concatemeric red fluorescent protein (RFP) that displays high brightness and can thus be used for live imaging (Luche, Weber et al. 2007).

*Hnf1b*-CreER<sup>T2</sup> - Rosa26- $\beta$ gal 8-12 week old mice were treated with tamoxifen (three doses of tamoxifen –20 mg, 20 mg, and 10 mg– by gavage every other day), and analyzed one week later typically showed 20-40% recombination efficiency in Cytokeratin 19-labeled pancreatic duct cells ((Solar, Cardalda et al.

2009) and **Figure 1A** ). The same treatment in *Hnf1b*-CreER<sup>T2</sup> - Rosa26-RFP mice led to 55-95% recombination efficiency in duct cells (73.6±6.3)(**Figure 1B and E**). Thus, the Rosa26-RFP reporter enabled much higher recombination efficiency in adult duct cells than previously reported with the same Cre allele.

This increased recombination efficiency when using a different reporter line led us to re-examine the pancreatic cell type specificity of *Hnf1b*-CreER<sup>T2</sup>-Rosa26-RFP mice with the same tamoxifen treatment. We found that  $\beta$  and  $\alpha$  cell labeling with Rosa26-RFP was not substantially higher than previously reported; 1.82%±0.44 of  $\beta$  cells were RFP+ and 2.28%±0.5 of  $\alpha$  cells were RFP+ (**Figure 1 E**). For comparison, with Rosa26- $\beta$ gal we found that 1.04%±0.48 of  $\beta$  cells were  $\beta$ gal+, and 1.22%±0.69 of  $\alpha$  cells were  $\beta$ gal+, which was similar to 1-2% labeling rates previously reported with *Hnf1b*-CreER<sup>T2</sup>-Rosa26- $\beta$ gal (Solar, Cardalda et al. 2009). We observed a similar very low recombination of insulin+ and glucagon+ cells amongst rare hormone producing cells that line the ductal epithelium. Thus, despite the marked increase in labeling efficiency of adult ducts, there was no increase in the number of  $\alpha$  and  $\beta$  cells carrying the label.

Our original studies focused on labeling of  $\beta$  and  $\alpha$  cells because they are by far the most prevalent islet endocrine cells, and because those studies needed to ensure if the model was valid for testing the hypothesis that duct cells give rise to  $\beta$  cells. Analysis of tamoxifen-treated *Hnf1b*-CreER<sup>T2</sup>-Rosa26-RFP mice, however, revealed conspicuous RFP+ cells in the mantle of some pancreatic islets, and were glucagon/insulin-negative, which led us to examine other hormones. Somatostatin-expressing  $\delta$  cells make up 1-5% of islet endocrine cells(Arrojo E Drigo, Jacob et al. 2019). We found that on average 49.5%±4.1 of  $\delta$  cells were RFP+ in *Hnf1b*-CreER<sup>T2</sup>;Rosa26-RFP islets (see **Figure 1C**, showing an islet with multiple  $\delta$  cells, and quantifications in **Figure 1E**). By contrast, only 1.45%±0.6 of pancreatic polypeptide cells were RFP+ (**Figure 1D and E**).

Labeling of  $\delta$  cells by the *Hnf1b*-CreER<sup>T2</sup> model could mean that Cre recombination took place in  $\delta$  cells at the outset of tamoxifen treatment because CreER is expressed in these cells, or else that recombination occurred in HNF1B-expressing duct cells which later gave rise to  $\delta$  cells. We thus analyzed nuclear Cre expression after a short (24 hour) tamoxifen treatment pulse. This showed widespread Cre protein expression in cells that line the duct epithelium (**Figure 2A**) as well as unequivocal expression of Cre protein in  $\delta$  cells, but not in other islet cells (**Figure 2B**). Because *Hnf1b*-CreER<sup>T2</sup> is a large ~190 Kb BAC transgenic model that is expected to recapitulate endogenous expression of *Hnf1b*, we next examined if Cre expression reflected the expression pattern of the endogenous HNF1B protein in  $\delta$  cells.



HNF1B immunostaining was very weakly detected in some endocrine cells, and occasionally some  $\delta$  cells showed slightly some nuclear immunofluorescence, but the expression was generally undetectable and clearly different from HNF1B-expressing duct cells (**Figure 2C**).

These findings, therefore, indicate that *Hnf1b*-CreER<sup>T2</sup> marks adult pancreatic  $\delta$  cells, and this can be ascribed to expression of Cre in these cells. The expression of Cre, but not HNF1B, could be due to higher transcriptional activity of *Hnf1b* in  $\delta$  cells that is not reflected by immunofluorescence due to cell-specific post-transcriptional inhibition of protein levels, or to cell-specific cis-acting silencing sequences that are not included in the 190 Kb transgenic BAC.

These new findings should be considered to interpret lineage tracing studies of adult duct cells and their progenitor potential. For studies that have not observed duct to  $\beta$  cell transitions in various settings, this does not modify the conclusions, except that they extend them because they indicate that neither duct cells nor any  $\delta$  cells that might have been labelled in adult mice give rise to other cells examined under those conditions. However, any studies that aim to elicit cellular conversions from ductal epithelium and use this model need to consider this alternate source of excised cells.

The results also show higher ductal excision rates than previously reported with the same Cre line. The efficiency of Cre-based excision can vary considerably for different LoxP alleles, which is often influenced by easier excision of shorter LoxP-flanked fragments. Our results indicate that the *Hnf1b*-CreER<sup>T2</sup> model can be used to ablate genes in the pancreatic duct epithelium provided that the target locus allows for high recombination, keeping in mind that  $\delta$  cells are also expected to recombine. The findings also indicate that Rosa26-RFP reporter can be used when higher efficiency of duct cell labeling is desired.

Finally, it is interesting to note that the widespread, sometimes nearly exhaustive, ductal excision did not increase the proportion of labeled  $\beta$  cells, including those that reside in ducts, showing that the ductal location of an islet cell should not be taken as evidence of a recent duct to  $\beta$  cell conversion.

### **Acknowledgements**

This research was supported by from Ministerio de Ciencia e Innovación (MCIU) (SAF2015-73226-JIN and RYC-2017-21950) and (FP-PEOPLE-2007-2-3-COFUND) to M.R. and grants to J.F. from Ministerio de Ciencia e Innovación (BFU2014-54284-R, RTI2018-095666-B-I00). Work in CRG was supported by the CERCA Programme, Generalitat de Catalunya and Centro de Excelencia Severo Ochoa (SEV-2015-0510).

### **Author Contributions:**

M.R., M.A.M., and J.F. conceived and coordinated the study. M.R., M.A.M. performed image analysis. V.G. maintained mouse colonies and performed tamoxifen treatments. M.R. and J.F. wrote the manuscript with input from the remaining authors.

### **Disclosure of Potential Conflicts of Interest:**

No potential conflicts of interest

### **References**

Arrojo E Drigo, R., et al. (2019). "Structural basis for delta cell paracrine regulation in pancreatic islets." Nat Commun **10**(1): 3700.

Herrera, P. L. (2000). "Adult insulin- and glucagon-producing cells differentiate from two independent cell lineages." Development **127**(11): 2317-2322.

Inada, A., et al. (2008). "Carbonic anhydrase II-positive pancreatic cells are progenitors for both endocrine and exocrine pancreas after birth." Proc Natl Acad Sci U S A **105**(50): 19915-19919.

Jörs, S., et al. (2015). "Lineage fate of ductular reactions in liver injury and carcinogenesis." J Clin Invest **125**(6): 2445-2457.

Kim, Y. H., et al. (2015). "Cell cycle-dependent differentiation dynamics balances growth and endocrine differentiation in the pancreas." PLoS Biol **13**(3): e1002111.

Kopinke, D., et al. (2011). "Lineage tracing reveals the dynamic contribution of Hes1+ cells to the developing and adult pancreas." Development **138**(3): 431-441.

Kopinke, D. and L. C. Murtaugh (2010). "Exocrine-to-endocrine differentiation is detectable only prior to birth in the uninjured mouse pancreas." BMC Dev Biol **10**: 38.

Kopp, J. L., et al. (2011). "Sox9+ ductal cells are multipotent progenitors throughout development but do not produce new endocrine cells in the normal or injured adult pancreas." Development **138**(4): 653-665.

Luche, H., et al. (2007). "Faithful activation of an extra-bright red fluorescent protein in "knock-in" Cre-reporter mice ideally suited for lineage tracing studies." Eur J Immunol **37**(1): 43-53.

Nir, T., et al. (2007). "Recovery from diabetes in mice by beta cell regeneration." J Clin Invest **117**(9): 2553-2561.

Seymour, P. A., et al. (2020). "Jag1 Modulates an Oscillatory Dll1-Notch-Hes1 Signaling Module to Coordinate Growth and Fate of Pancreatic Progenitors." Dev Cell **52**(6): 731-747.e738.

Solar, M., et al. (2009). "Pancreatic exocrine duct cells give rise to insulin-producing beta cells during embryogenesis but not after birth." Dev Cell **17**(6): 849-860.

Vieira, A., et al. (2018). "Neurog3 misexpression unravels mouse pancreatic ductal cell plasticity." PLoS One **13**(8): e0201536.

Zhao, H., et al. (2021). "Pre-existing beta cells but not progenitors contribute to new beta cells in the adult pancreas." Nat Metab **3**(3): 352-365.

Zhou, Q., et al. (2007). "A multipotent progenitor domain guides pancreatic organogenesis." Dev Cell **13**(1): 103-114.

## Figure legends

**Figure 1: Efficient recombination in pancreatic ducts and labeling specificity in endocrine lineages.** (A) Immunofluorescence for  $\beta$ -galactosidase (green), Cytokeratin 19 (CK19, red) and DAPI (blue) in adult mouse pancreas shows moderate efficiency of recombination of the *Hnf1b*-CreER<sup>T2</sup>;Rosa26- $\beta$ -gal transgenics in duct cells. (B) Immunofluorescence for RFP (green), Cytokeratin 19 (CK19, red) and DAPI (blue) in adult mouse pancreas shows high efficiency of recombination of the *Hnf1b*-CreER<sup>T2</sup>;Rosa26-RFP transgenics in ductal cells. (C) Immunofluorescence for RFP (red), somatostatin (Som, green) and DAPI (blue) in adult mouse pancreas shows recombination in somatostatin positive  $\delta$  cells in *Hnf1b*-CreER<sup>T2</sup>;Rosa26-RFP transgenics. (D) Immunofluorescence for RFP (red), pancreatic polypeptide (PP, green) and DAPI (blue) in adult mouse pancreas shows very low recombination of PP-expressing cells in *Hnf1b*-CreER<sup>T2</sup>;Rosa26-RFP transgenics. White arrowheads indicate double positive cells while empty arrow heads indicate single positive cells. (E) Percentage of RFP positive cells in duct (n=6 mice),  $\beta$  (n= 4 mice),  $\alpha$  (n= 4 mice),  $\delta$  (n= 4 mice) and PP (n= 4 mice) positive cells. Antibodies used in the study: RFP (Rockland #600-401-379S, 1:500), CK19 (Hybridoma Bank #Troma-III, 1:50), Insulin (Dako #A0564, 1:1000), Glucagon (Cell Signaling #2760S, 1:500), Somatostatin, PP.

**Figure 2: Cre is expressed in  $\delta$  cells.** (A) Immunofluorescence for Cre (red), Dolichos Biflorus Agglutinin (DBA, green) and DAPI (blue) in adult mouse *Hnf1b*-CreER<sup>T2</sup>;Rosa26-RFP pancreas upon 24 hours of tamoxifen treatment shows high Cre expression in duct cells. (B) Immunofluorescence for Cre (red), somatostatin (Som, green) and DAPI (blue) in adult transgenic mouse pancreas upon 24 hours of tamoxifen treatment shows Cre expression in several  $\delta$  cells. (C) Immunofluorescence for HNF1B (red), somatostatin (Som, green) and DAPI (blue) in adult transgenic mouse pancreas upon 24 hours of tamoxifen treatment shows strong expression of HNF1B in ductal cells but not in somatostatin positive cells. White arrowheads indicate double positive cells while empty arrow heads indicate single positive cells. Antibodies used in the study: DBA (vector laboratories #FL-1031, 1:200) HNF1B, Cre, Somatostatin.

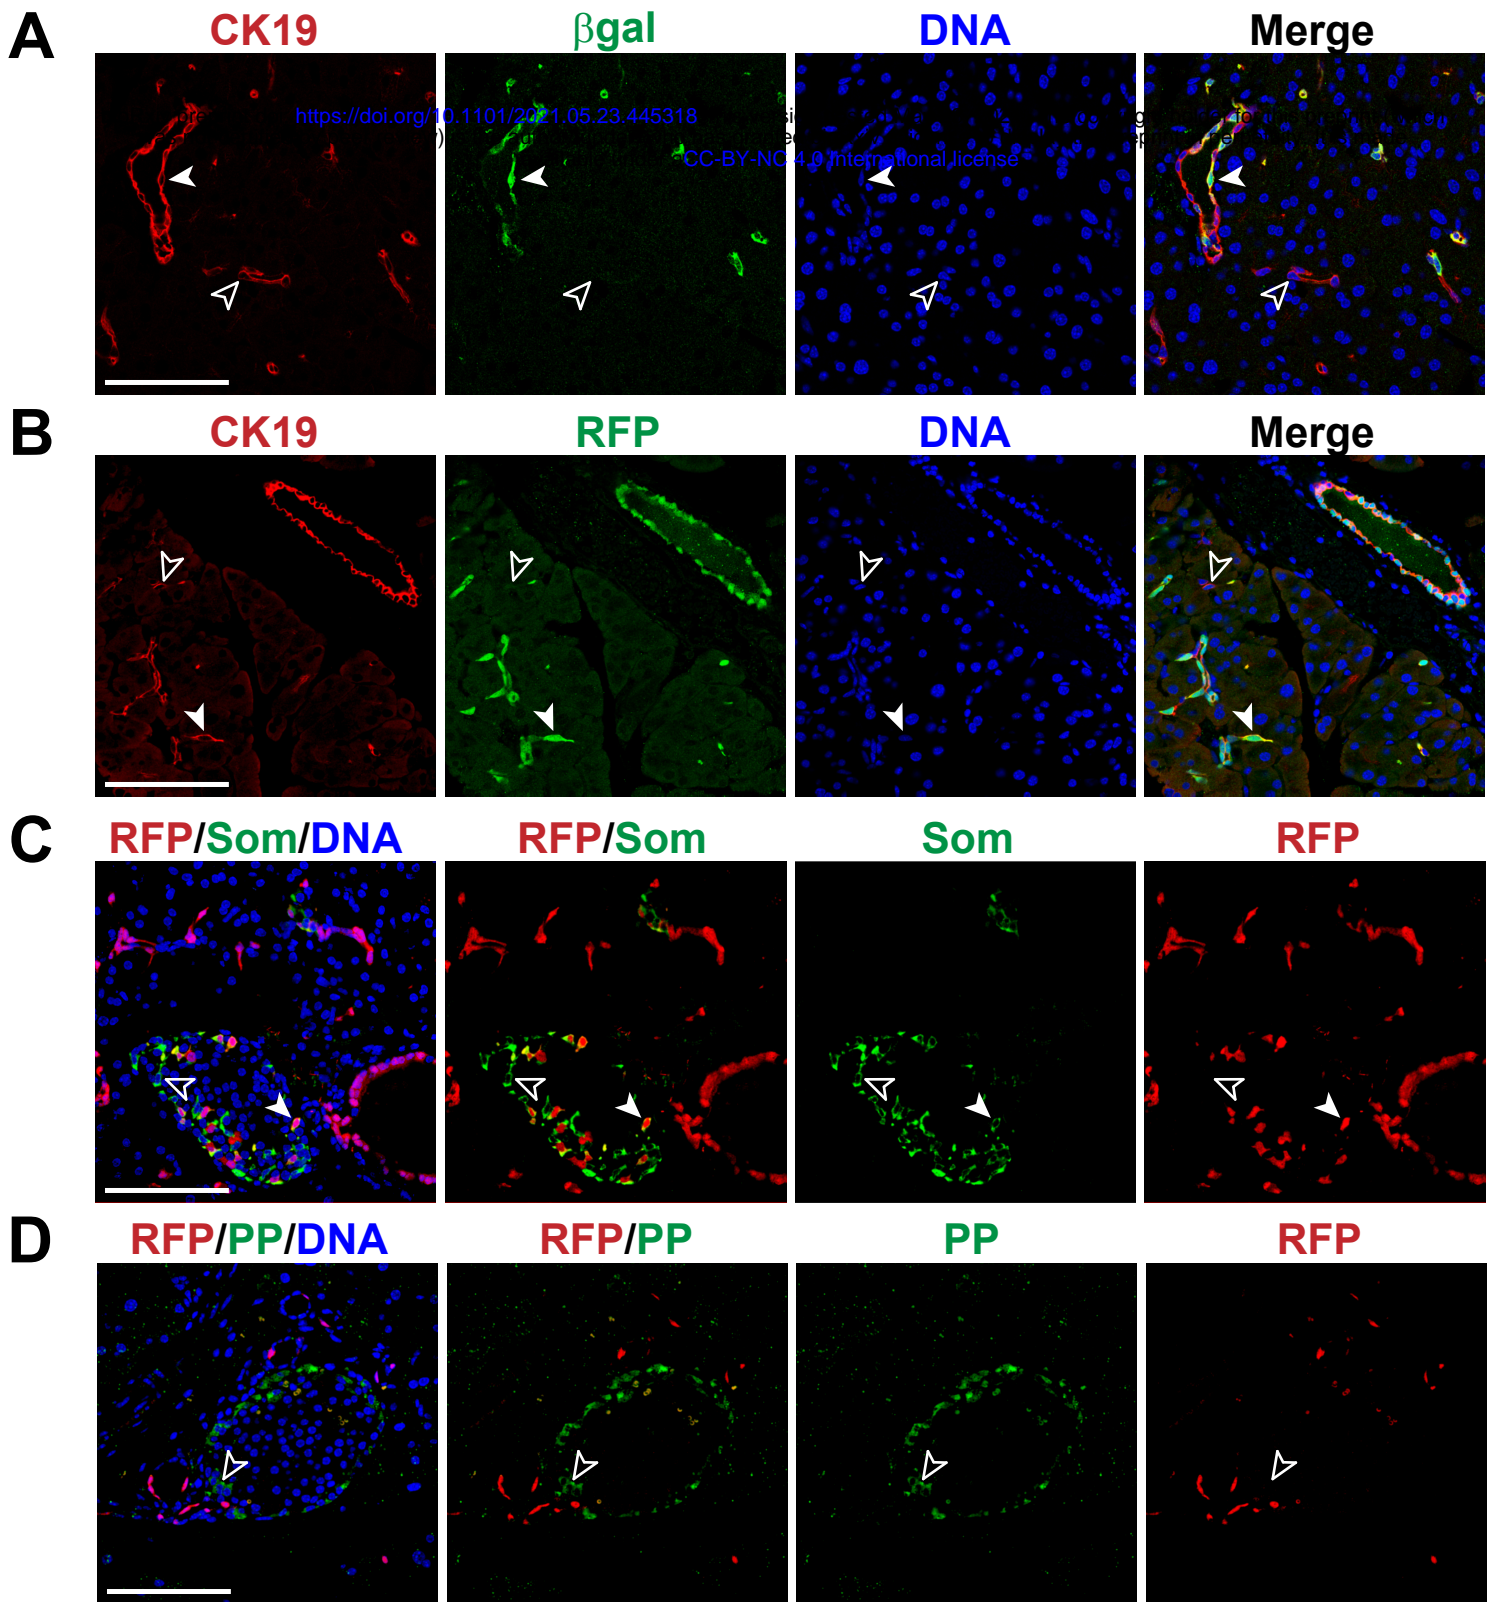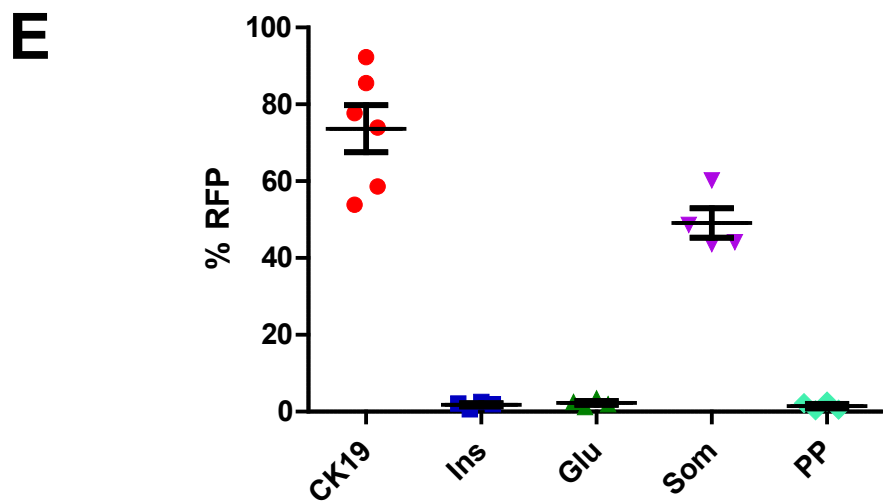

Figure 1

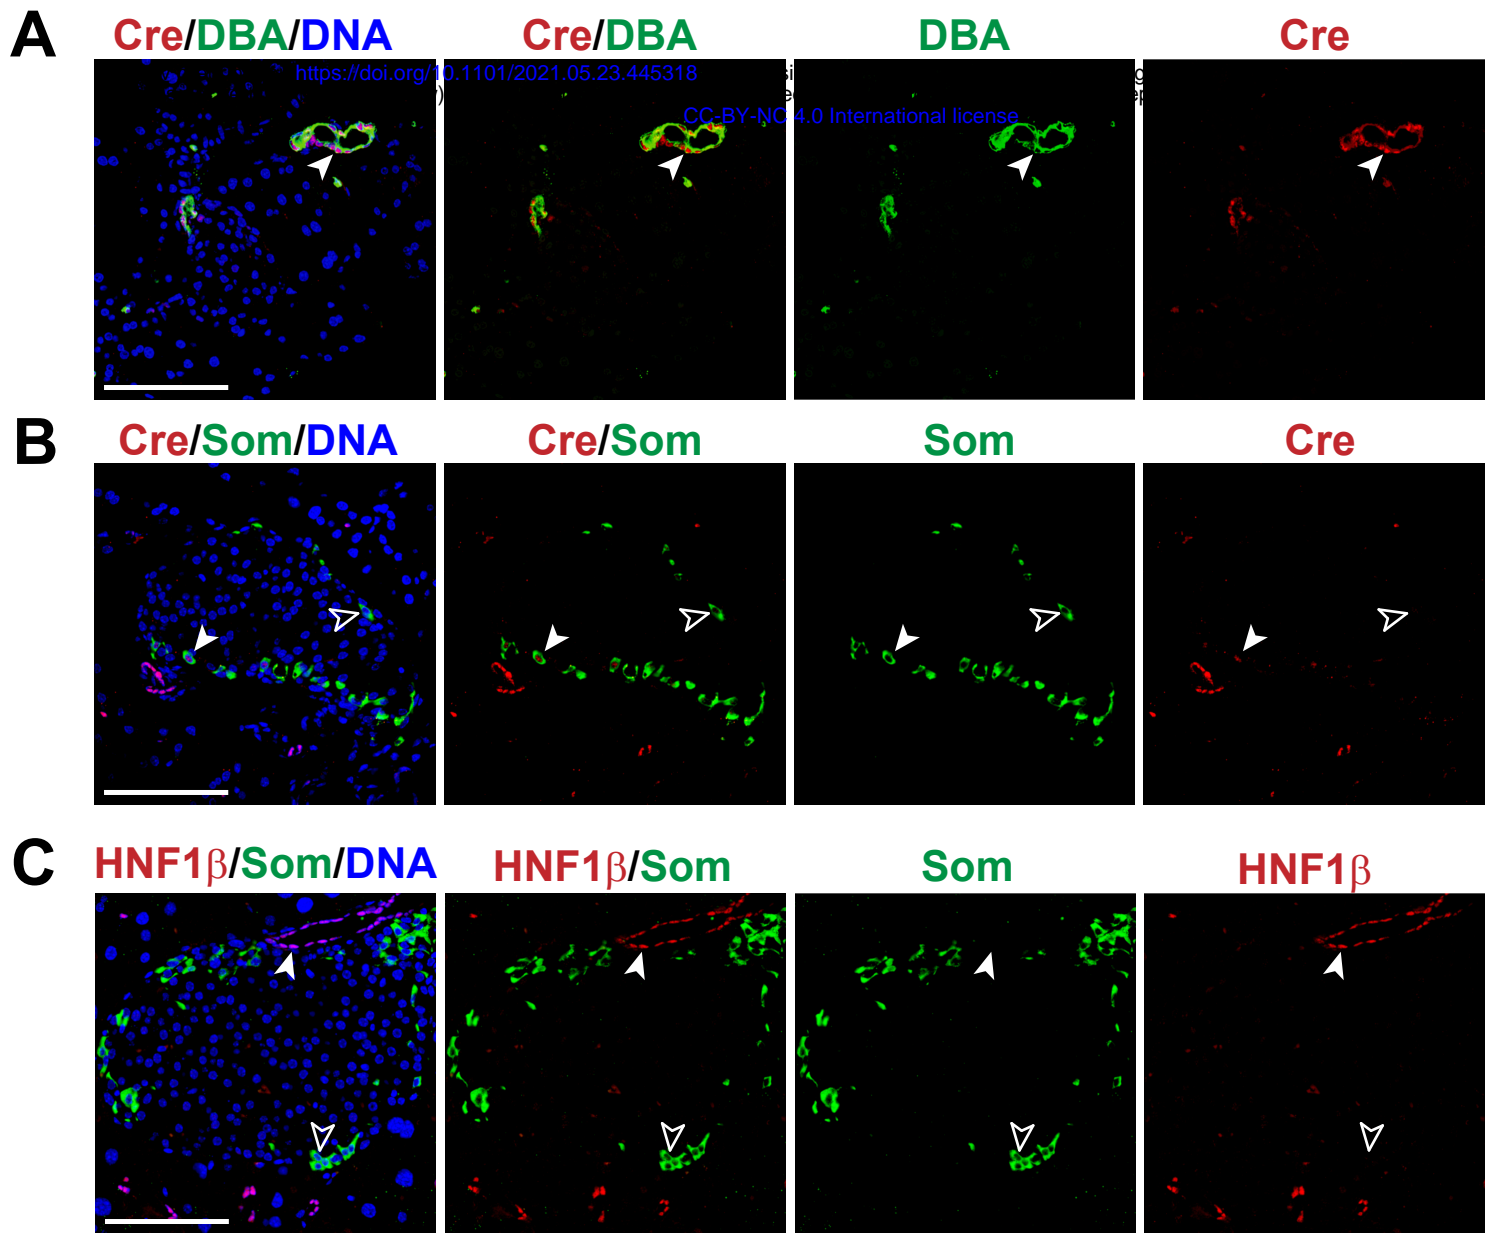

Figure 2
